# Supplementary material for: Wearable Capacitive Pressure Sensor for Contact and Non-Contact Sensing and Pulse Waveform Monitoring
Source: MDPI journal article supplement (doi:10.3390/molecules27206872), 2022-10-13
Supplement: s1 [file s1]

## Supporting Information

# Wearable Capacitive Pressure Sensor for Contact and Non-Contact Sensing and Pulse Waveforms Monitoring

Azmal Huda Chowdhury <sup>1</sup>, Borzooye Jafarizadeh <sup>1</sup>, Nezih Pala <sup>2</sup> and Chunlei Wang <sup>1,3,\*</sup>

<sup>1</sup> Department of Mechanical and Materials Engineering, Florida International University, Miami, FL 33174, USA

<sup>2</sup> Department of Electrical and Computer Engineering, Florida International University, Miami, FL 33174, USA

<sup>3</sup> Center for Study of Matter at Extreme Conditions, Florida International University, Miami, FL 33174, USA

\* Correspondence: wangc@fiu.edu

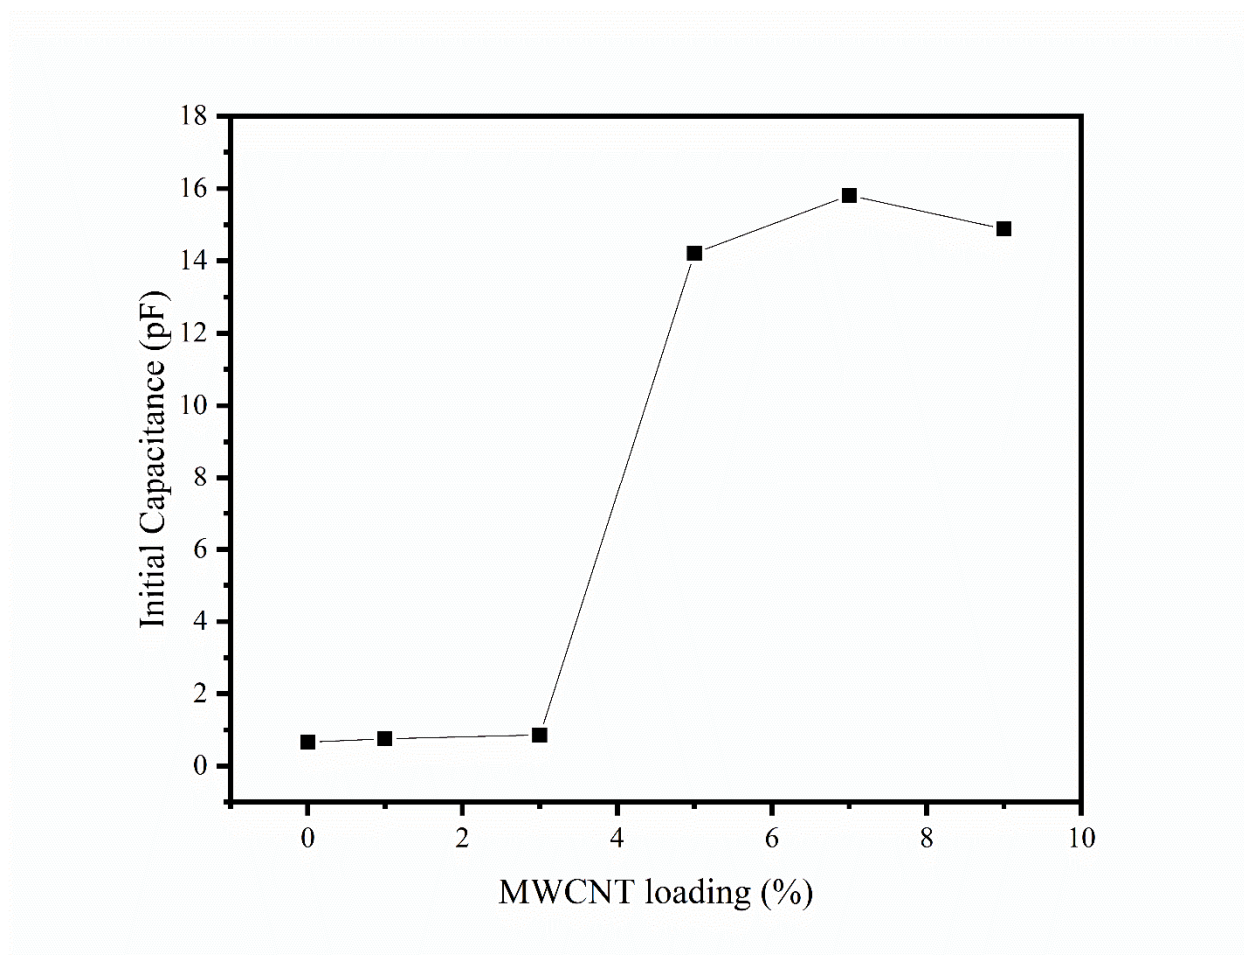

*Figure S1: Change in base capacitance with the addition of MWCNT.*

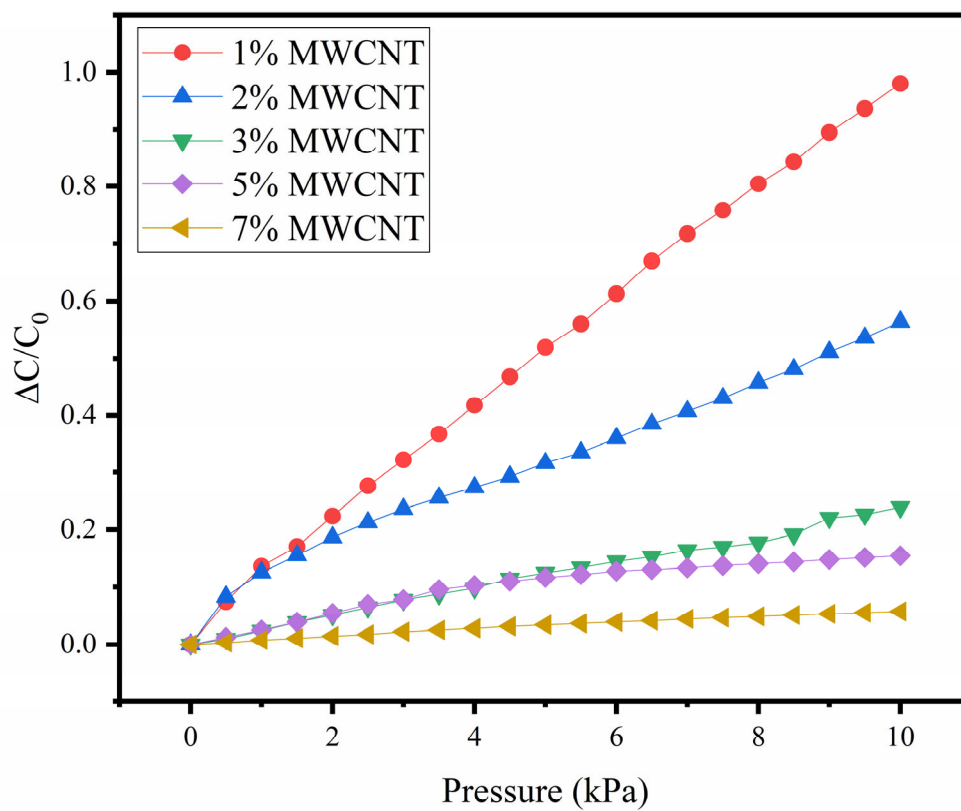

Figure S2: Decrease in relative capacitance with higher concentration of MWCNT.

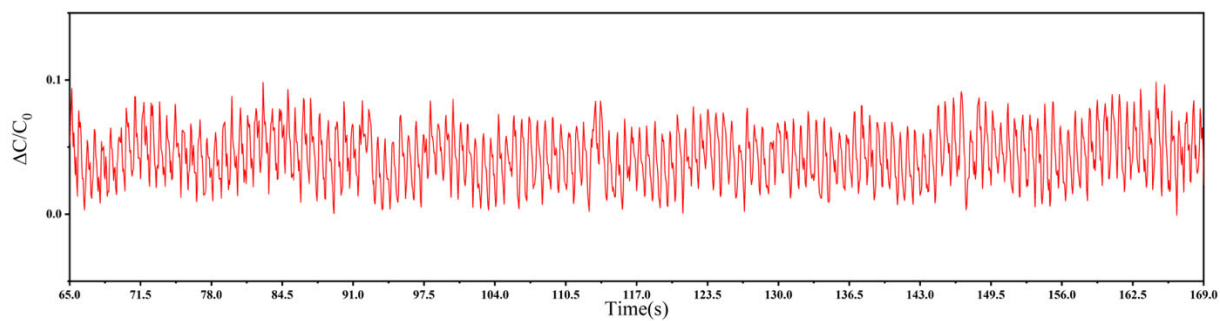

Figure S3: Pulse waveforms collection for a wide range of data collection.

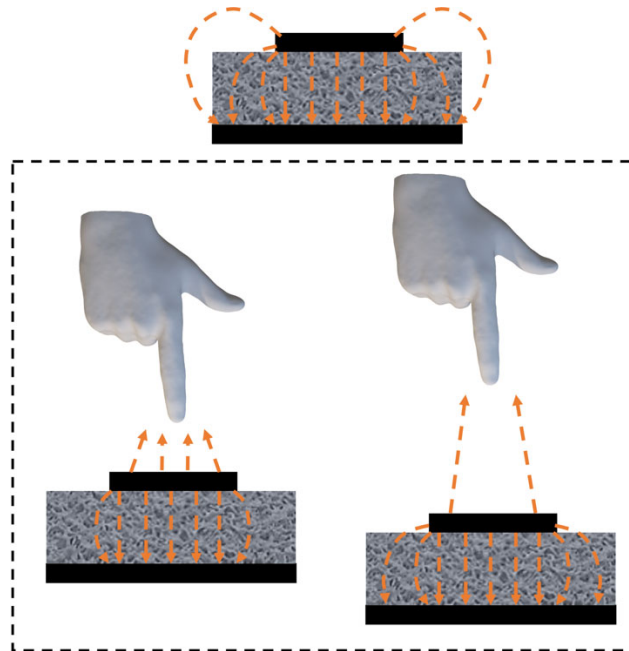

*Figure S4: Proximity sensing mechanism*
